# Supplementary material
Source: Research Square preprint supplement (doi:10.21203/rs.3.rs-9934993/v1)
Supplement: Supplementary file 1 [file 7eaeeff8dabd3d3616a77632.docx]

**Supplementary Information**

**Supplementary Note 1. Deauville Scoring Criteria**

We followed the standard Deauville five-point scale for PET/CT-based response assessment in lymphoma. The criteria define treatment response by comparing lesion uptake with reference regions, including the mediastinal blood pool and liver.

The scoring scheme is summarized as follows:

1. Score 1: No abnormal uptake.

2. Score 2: Uptake ≤ mediastinal blood pool.

3. Score 3: Mediastinal < uptake ≤ liver.

4. Score 4: Liver < uptake ≤ 2× liver.

5. Score 5: Uptake > 2× liver.

X: New uptake unlikely related to lymphoma under specific conditions.

**Supplementary Note 2. Prompting and Reasoning Protocol**

To operationalize the Deauville scoring process for large language models, we designed a structured prompting protocol that explicitly decomposes the task into clinically aligned reasoning steps.

The protocol incorporates:

(1) lymphoma relevance assessment,

(2) lesion inclusion criteria,

(3) candidate lesion identification,

(4) main lesion selection,

(5) final score determination.

The model is guided to follow a stepwise reasoning process, including:

- structured lesion-level interpretation,

- explicit justification for lesion inclusion/exclusion,

- comparison with reference uptake,

- and final score summarization.

**Supplementary Note 3. Full Prompt Template**

| Task Description | This task aims to perform Deauville scoring based on PET/CT reports. The model is required to strictly follow the provided scoring criteria and reasoning steps. Given the clinical history, current imaging findings, and the conclusion of the prior examination, the model should infer the Deauville score for the current examination.  The model must first briefly summarize the overall scoring strategy, then perform stepwise reasoning, ensuring logical consistency across all steps. Finally, the model should output both the reasoning process and the final answer in the following format:  <Thinking>  ... reasoning process ...  </Thinking>  <Answer>  ... final score and justification ...  </Answer>  The reasoning process should include both the overall scoring strategy and stepwise decision-making, while the answer should summarize the final score and its justification. |
| --- | --- |
| Lymphoma Relevance Assessment Criteria | Each lesion should be classified into one of the following categories:  1. Lymphoma-related:  - Explicitly described in prior reports as lymphoma involvement, recurrence, or residual disease.  - Mentioned in clinical history as a known lymphoma site.  - Appears in the primary statement of prior conclusions without indication of normalization or metabolic decrease.  2. Lymphoma-unrelated:  - Described as benign, physiological, inflammatory, reactive, post-operative, fracture-related, or normal.  3. Indeterminate:  - Described as uncertain, requiring further evaluation, biopsy, or follow-up.  - Expressions such as “cannot exclude lymphoma” or “to be determined”.  4. For newly identified lesions:  - Lesions located in regions prone to physiological uptake (e.g., Waldeyer’s ring, gastrointestinal tract) are more likely unrelated.  - Common benign findings (e.g., reactive lymph nodes, inflammatory lesions, thymic hyperplasia) are considered unrelated.  - Lesions distant from the original lymphoma site are more likely unrelated. |
| Lesion Inclusion Criteria for Scoring | Lesions are included for scoring according to the following ordered rules (stop when a rule applies):  1. Lymphoma-related lesions are generally included, except:  - Hilar lymph nodes are excluded if other definite lymphoma lesions exist, unless they extend beyond the hilum or form a mass.  - Intracranial lesions are excluded if other lymphoma lesions are present.  - Diffuse spleen or bone marrow uptake below liver background is excluded.  - Diffuse uptake without focality or CT abnormality is excluded.  2. Residual indeterminate lesions:  - Included unless definite lymphoma-related lesions exist.  3. Newly developed indeterminate lesions:  - Included unless uptake is below liver background or excluded by anatomical rules.  4. Newly developed unrelated lesions:  - Included only if no indeterminate lesions are included and uptake exceeds liver background.  - Excluded under specific anatomical or physiological conditions.  5. Residual unrelated lesions:  - Always excluded. |
| Deauville Scoring Criteria | The Deauville score is defined as:  1: No abnormal uptake  2: Uptake ≤ mediastinal blood pool  3: Mediastinal < uptake ≤ liver  4: Liver < uptake ≤ 2 × liver  5: Uptake > 2 × liver  X: Special condition where lymphoma-related lesions score ≤3 but a new unrelated lesion shows uptake > liver |
| Stepwise Reasoning Procedure | Step 1: Lesion-level analysis  For each lesion:  - Determine lymphoma relevance and whether it should be included for scoring.  - Provide justification without explicitly referencing rule numbers.  - Output a structured table including:  lesion, SUVmax, lesion status, lymphoma relevance, inclusion decision, and reasoning.  Step 2: Candidate lesion selection  - Exclude all lesions marked as “not included”.  - Identify:  - lymphoma-related candidate lesions  - newly developed unrelated candidate lesions  - Select the main lesion (highest SUVmax) in each category.  - Provide justification for selection.  Step 3: Score determination  - Compare lesion uptake with mediastinal and liver reference values.  - Assign Deauville scores to candidate lesions.  - Apply clinical decision rules:  - If lymphoma-related lesion score >3 → final score determined directly.  - If ≤3 → evaluate influence of new lesions.  - Determine final score accordingly. |
| Summary Examples | Example 1:  A lymphoma-related lesion shows SUVmax significantly higher than twice the liver background, resulting in a score of 5. Based on clinical practice, high scores do not require consideration of new lesions. Final score: 5.  Example 2:  A lymphoma-related lesion has uptake below mediastinal background, resulting in a score of 2. Although new lesions exist, they are considered physiological and excluded. Final score: 2.  Example 3:  A lymphoma-related lesion has a score of 3. A newly developed unrelated lesion shows uptake above liver background. Based on clinical rules, the final score is X. |

**Supplementary Note 4. Examples of Longitudinal PET/CT Reports**

| Prior Examination | Examination date: April 19, 2022.  Under fasting conditions, 6.81 mCi of 18F-FDG was administered intravenously. PET/CT imaging was performed 1 hour after injection, with good image quality. Breath-hold CT of the chest was acquired.  Reference uptake:  Mediastinal blood pool SUVmax: 1.7  Liver SUVmax: 2.5  Findings:  The brain demonstrated normal morphology with symmetric and homogeneous tracer uptake in the cerebral cortex, basal ganglia, thalami, and cerebellum. No focal areas of abnormal increased or decreased uptake were observed. The ventricular system and midline structures were unremarkable. The paranasal sinuses and mastoid air cells were normal. Physiological symmetric uptake was observed in the oropharyngeal glands. No abnormal uptake was identified in the nasopharynx. The thyroid gland was normal in size with slightly heterogeneous density but no abnormal FDG uptake. No enlarged lymph nodes or abnormal uptake were identified in the cervical or supraclavicular regions. Post PICC catheter placement was noted. The thorax was symmetric, and the mediastinum was midline. The trachea and bronchi were patent. The bronchovascular markings were normal. Multiple small pulmonary nodules and ground-glass opacities were observed in both lungs without significant FDG uptake. No enlarged mediastinal or hilar lymph nodes were detected. The myocardium, pleura, breasts, and axillary regions showed no abnormal uptake. The liver was normal in size and contour, with several small low-density lesions and homogeneous tracer uptake. The gallbladder and biliary system were unremarkable. The pancreas, spleen, adrenal glands, kidneys, urinary system, uterus, and adnexa showed no significant abnormalities. Focal thickening of the gastric wall near the antrum was observed, with markedly increased FDG uptake (SUVmax 11.6). Several small adjacent lymph nodes were present without significant uptake.  No ascites or retroperitoneal lymphadenopathy was identified. No abnormal uptake was observed in the bones, skin, or soft tissues.  Impression:  1. Focal gastric wall thickening near the antrum with increased metabolic activity, suspicious for malignancy; findings are consistent with lymphoma in the appropriate clinical context. Adjacent small lymph nodes without significant uptake.  2. Multiple small pulmonary nodules and ground-glass opacities without metabolic activity; follow-up recommended.  3. Mildly heterogeneous thyroid gland without abnormal uptake; correlation with clinical evaluation recommended.  4. Multiple small hepatic cysts. |
| --- | --- |
| Current Examination | Clinical history:  The patient developed gastric pain after treatment for a urinary tract infection three months prior. Gastroscopy revealed an ulcerative mass at the gastric body–antrum junction (pathology pending). Bone marrow biopsy (April 18, 2022) confirmed diffuse large B-cell lymphoma. The patient received two cycles of R-CHOP chemotherapy (April 19 and May 11, 2022). PET/CT was performed for treatment response evaluation.  Examination date: June 1, 2022.  PET/CT was performed under the same protocol as the prior study. Mediastinal and liver SUVmax remained 1.7 and 2.5, respectively.  Findings:  Overall findings were largely unchanged compared with the prior examination. The previously noted gastric wall thickening near the antrum persisted, with continued increased FDG uptake (SUVmax 11.6). Adjacent lymph nodes remained without significant uptake. No new abnormal FDG-avid lesions were identified. Pulmonary nodules, thyroid findings, and hepatic cysts remained stable. No new lymphadenopathy or abnormal uptake was observed elsewhere.  Impression:  Comparison with prior PET/CT (April 19, 2022):  1. Persistent focal gastric wall thickening with increased metabolic activity, consistent with lymphoma.  2. Stable pulmonary nodules without FDG uptake.  3. Stable thyroid findings without abnormal uptake.  4. Stable hepatic cysts. |

**Supplementary Note 5. Structured Input Representation**

| Clinical history | The patient developed gastric pain after treatment for a urinary tract infection three months prior. Gastroscopy at our hospital revealed an ulcerative mass at the anterior wall of the gastric body–antrum junction, with pathology pending at that time. Bone marrow biopsy performed on April 18, 2022 confirmed diffuse large B-cell lymphoma. The patient received two cycles of R-CHOP chemotherapy on April 19, 2022 and May 11, 2022. PET/CT was performed for treatment response evaluation. |
| --- | --- |
| Current examination findings | Under fasting conditions, 6.81 mCi of 18F-FDG was administered intravenously. PET/CT imaging was performed 1 hour after injection, with good image quality. Breath-hold CT of the chest was acquired. The mediastinal blood pool SUVmax was 1.7, and the liver SUVmax was 2.5. The brain demonstrated clear visualization, with generally homogeneous tracer uptake in the cerebral cortex. Tracer uptake was generally homogeneous in the bilateral frontal, parietal, temporal, and occipital lobes. Symmetric uptake was observed in the bilateral basal ganglia, thalami, and cerebellum, without obvious focal increased or decreased tracer uptake. The ventricular system was normal in size and morphology. No obvious widening of the cerebral sulci or fissures was observed, and cerebrospinal fluid density showed no obvious abnormality. The midline structures were centered. Bone-window images showed no obvious abnormality of the skull. The visualized paranasal sinuses and bilateral mastoid air cells were unremarkable. Physiological symmetric tracer uptake was observed in the bilateral oropharyngeal glands. No abnormal tracer uptake was identified in the nasopharynx. The thyroid gland was not enlarged and showed acceptable morphology, with slightly heterogeneous parenchymal density but no obvious abnormal tracer uptake. No obviously enlarged lymph nodes or abnormal tracer uptake were identified in the bilateral cervical or supraclavicular regions. Post PICC catheter placement was noted. The thorax was symmetric, and the mediastinum was midline. The trachea and lobar/segmental bronchi were patent. The bronchovascular markings in both lungs were clearly visualized, without obvious abnormal course. Several small nodules and small ground-glass opacities were observed in both lungs, none showing obvious tracer uptake. No obviously enlarged lymph nodes or abnormal tracer uptake were identified in the mediastinum or bilateral hilar regions. No abnormal tracer uptake was observed in the myocardium. No obvious pleural thickening was seen bilaterally, and there was no pleural effusion. No abnormal tracer uptake was observed in the bilateral breasts. No obviously enlarged lymph nodes or abnormal tracer uptake were identified in the bilateral axillary regions. The liver showed acceptable morphology, smooth contour, and normal lobar proportion. Several small low-density lesions were seen in the liver, and tracer uptake in the hepatic parenchyma was generally homogeneous. The gallbladder was normal in size, without obvious wall thickening. No obvious dilatation of the intrahepatic or extrahepatic bile ducts was observed. The hepatic hilum was unremarkable. The pancreas showed no obvious morphological abnormality, with generally homogeneous tracer uptake and no obvious pancreatic duct dilatation. The spleen was mildly visualized, with generally homogeneous tracer uptake. The bilateral adrenal glands were generally normal. The bilateral kidneys were well visualized, with homogeneous renal parenchymal density. No obvious dilatation of the renal pelvis, calyces, or ureters was observed. The bladder showed no obvious abnormality in morphology or tracer uptake. The uterus was not enlarged and showed acceptable morphology, without obvious focal abnormal tracer uptake. No obvious abnormal tracer uptake was identified in the bilateral adnexal regions. Focal gastric wall thickening near the antrum was observed, with increased tracer uptake, SUVmax 11.6. Several small adjacent lymph nodes were present, without obvious tracer uptake. No other obvious abnormal density or abnormal tracer uptake was identified in the remaining gastrointestinal tract. No ascites was observed. No obviously enlarged retroperitoneal lymph nodes were identified. No obvious abnormal lymph nodes were observed in the bilateral inguinal regions. No obvious abnormal tracer uptake was observed in the axial skeleton within the field of view. No obvious abnormal tracer uptake was observed in the skin or soft tissues within the field of view. |
| Prior examination impression | 1. Focal gastric wall thickening near the antrum with increased metabolic activity, suspicious for malignancy; in combination with the clinical history, the finding is consistent with lymphoma. Multiple small adjacent lymph nodes were present without obvious metabolic activity.  2. Multiple small pulmonary nodules and small ground-glass opacities in both lungs, without obvious metabolic activity; close follow-up is recommended.  3. Slightly heterogeneous density of both thyroid lobes, without obvious abnormal metabolic activity; correlation with specialist evaluation is recommended.  4. Multiple small hepatic cysts are possible. |

**Supplementary Note 6. Model Reasoning Examples**

| <Thought>  Scoring rationale: Based on the lesion information in the current examination findings, together with the prior examination impression and lymphoma relevance criteria, we determine the lymphoma relevance of each lesion and whether it should be included in scoring. Candidate lesions related to lymphoma involvement and candidate lesions unrelated to lymphoma are identified. After selecting the main lesion, the Deauville score is determined based on the mediastinal blood pool and liver SUVmax values, combined with clinical reasoning.  Step 1: Lesion analysis   | Lesion description (inline) | SUVmax | Status | Lymphoma relevance | Candidate lesions identification | Explain | | --- | --- | --- | --- | --- | --- | | Focal gastric wall thickening near the gastric antrum | 11.6 | Residual | residual | related | The prior examination impression concluded that this site was suspicious for malignancy and, in the appropriate clinical context, consistent with lymphoma. This represents a residual lesion at the primary site with clear structural abnormality (focal gastric wall thickening) and markedly increased tracer uptake (SUVmax 11.6), which is significantly higher than the liver background; therefore, it is included for scoring. |   Step 2: Main lesion selection  - Lesions excluded from scoring: None. All identified lesions are included for scoring.  - Candidate lesions with lymphoma involvement: Focal gastric wall thickening near the antrum (SUVmax 11.6, residual, involved), which satisfies the criteria and is selected as the main lesion.  - Newly emerged lymphoma-unrelated candidate lesions: None.  Step 3: Deauville scoring  - Mediastinal blood pool SUVmax: 1.7; liver SUVmax: 2.5.  - The main lymphoma-related lesion (focal gastric wall thickening near the antrum) has SUVmax 11.6, which is markedly higher than twice the liver uptake (2 × 2.5 = 5.0), corresponding to a Deauville score of 5.  - Given a score of 5 (>3), and based on clinical reasoning, the influence of newly emerged lesions does not need to be considered. In this case, no newly emerged lymphoma-unrelated lesions are present.  - Therefore, the final score is 5.  </Thought>  <Answer>  The main lymphoma-involved lesion is the focal gastric wall thickening near the antrum (SUVmax 11.6). The prior examination impression explicitly described this lesion as consistent with lymphoma, and its SUVmax is markedly higher than twice the liver uptake (liver SUVmax 2.5), corresponding to a Deauville score of 5. Based on clinical reasoning, scores of 4–5 do not require consideration of newly emerged lesions, and no newly emerged lymphoma-unrelated lesions are present in this case. Therefore, the final Deauville score is 5.  </Answer> |
| --- | --- | --- | --- | --- | --- | --- | --- | --- | --- | --- | --- | --- |
